1 **Oo-site: A dashboard to visualize gene expression during *Drosophila* oogenesis reveals**  
2 **meiotic entry is regulated post-transcriptionally**

3 Elliot T. Martin<sup>1\*</sup>, Kahini Sarkar<sup>1,4</sup>, Alicia McCarthy<sup>1</sup>, and Prashanth Rangan<sup>1,4\*</sup>

4 <sup>1</sup>Department of Biological Sciences/RNA Institute, University at Albany SUNY, Albany, NY  
5 12202

6 <sup>4</sup>Black Family Stem Cell Institute, Department of Cell, Developmental, and Regenerative  
7 Biology, Icahn School of Medicine at Mount Sinai, 1 Gustave L. Levy Place, New York, NY  
8 10029, USA

9 \*Co-corresponding authors

10 Email: [etmartin@albany.edu](mailto:etmartin@albany.edu) and [prashanth.rangan@mssm.edu](mailto:prashanth.rangan@mssm.edu)

11

12 **Summary**

13 Determining how stem cell differentiation is controlled has important implications for  
14 understanding the etiology of degenerative disease and designing regenerative therapies. *In vivo*  
15 analyses of stem cell model systems have revealed regulatory paradigms for stem cell self-  
16 renewal and differentiation. The germarium of the female *Drosophila* gonad, which houses both  
17 germline and somatic stem cells, is one such model system. Bulk mRNA sequencing (RNA-seq),  
18 single-cell (sc) RNA-seq, and bulk translation efficiency of mRNAs are available for stem cells  
19 and their differentiating progeny within the *Drosophila* germarium. However, visualizing those data  
20 is hampered by the lack of a tool to spatially map gene expression and translational data in the  
21 germarium. Here, we have developed Oo-site (<https://www.ranganlab.com/Oo-site>), a tool for  
22 visualizing bulk RNA-seq, scRNA-seq, and translational efficiency data during different stages of  
23 germline differentiation, that makes these data accessible to non-bioinformaticians. Using this  
24 tool, we recapitulated previously reported expression patterns of developmentally regulated  
25 genes and discovered that meiotic genes, such as those that regulate the synaptonemal complex,  
26 are regulated at the level of translation.

27

28 **Introduction**

29 The *Drosophila* ovary provides a powerful system to study stem cell differentiation *in vivo* (Bastock  
30 and St Johnston, 2008; Eliazer and Buszczak, 2011; Lehmann, 2012; Spradling et al., 2011). The  
31 *Drosophila* ovary consists of two main cell lineages, the germline, which ultimately gives rise to

32 eggs, and the soma, which surrounds the germline and plays a supportive role in egg  
33 development (Eliazer and Buszczak, 2011; Roth, 2001; Schüpbach, 1987; Xie and Spradling,  
34 2000). Each stage of *Drosophila* female germline stem cell (GSC) differentiation is observable  
35 and identifiable, allowing GSC development to be easily studied (Bastock and St Johnston, 2008;  
36 Lehmann, 2012; Xie and Spradling, 1998). Specifically, female *Drosophila* GSCs undergo an  
37 asymmetric division, giving rise to another GSC and a cystoblast (CB) (**Figure 1A**) (Chen and  
38 McKearin, 2003b; McKearin and Ohlstein, 1995; Xie and Spradling, 1998). The GSC and CB are  
39 marked by a round structure called the spectrosome (**Figure 1A**) (De Cuevas and Spradling,  
40 1998; Zaccai and Lipshitz, 1996). The CB then undergoes four incomplete divisions resulting in  
41 2-, 4-, 8-, and finally 16-cell cysts (CC), which are marked by an extended structure called the  
42 fusome (**Figure 1A**) (Chen and McKearin, 2003a, 2003b; De Cuevas and Spradling, 1998). In the  
43 16-CC, one of the cyst cells is specified as the oocyte, while the other 15 cells become nurse  
44 cells, which provide proteins and mRNAs to support the development of the oocyte (**Figure 1A**)  
45 (Bastock and St Johnston, 2008; Carpenter, 1975; Huynh and St Johnston, 2000, 2004; Navarro  
46 et al., 2001; Theurkauf et al., 1993). The 16-CC is encapsulated by somatic cells and buds off  
47 from the germarium, forming an egg chamber (**Figure 1A**) (Bastock and St Johnston, 2008;  
48 Forbes et al., 1996; Xie and Spradling, 2000). In each chamber, the oocyte grows as the nurse  
49 cells synthesize and then deposit mRNAs and proteins into the oocyte, which eventually gives  
50 rise to a mature egg (Bastock and St Johnston, 2008; Huynh and St Johnston, 2000).

51  
52 Expression of differentiation factors, including those that regulate translation, results in  
53 progressive differentiation of GSCs to an oocyte (Blatt et al., 2020; Slaidina and Lehmann, 2014).  
54 In the CB, Bag-of-marbles (Bam) expression promotes differentiation and the transition from CB  
55 to 8-CC stage (Chen and McKearin, 2003a; McKearin and Ohlstein, 1995; Ohlstein and McKearin,  
56 1997). In the 8-CC, RNA-binding Fox protein 1 (Rbfox1) promotes exit from the mitotic cell cycle  
57 into meiosis (Carreira-Rosario et al., 2016). Both the differentiation factors Bam and Rbfox1 affect  
58 the translation of mRNAs to promote differentiation (Carreira-Rosario et al., 2016; Li et al., 2009;  
59 Tastan et al., 2010). In addition, in 8-CCs, recombination is initiated across many cyst cells and  
60 then eventually is restricted to the specified oocyte (Hinnant et al., 2020; Huynh and St Johnston,  
61 2000). Neither the mRNAs that are translationally regulated during this progressive differentiation  
62 nor how recombination is temporally regulated is fully understood (Cahoon and Hawley, 2016;  
63 Carreira-Rosario et al., 2016; Flora et al., 2018; Rubin et al., 2020; Slaidina and Lehmann, 2014;  
64 Tanneti et al., 2011; Wei et al., 2014).

65

66 Within the germarium, the germline is surrounded by and relies on distinct populations of somatic  
67 cells for signaling, structure, and organization (Roth, 2001; Schüpbach, 1987; Xie and Spradling,  
68 2000, 1998). For example, the terminal filament, cap, and anterior-escort cells act as a somatic  
69 niche for the GSCs (Decotto and Spradling, 2005; Lin and Spradling, 1993; Wang and Page-  
70 McCaw, 2018; Xie and Spradling, 2000). Once GSCs divide to give rise to CBs, posterior escort  
71 cells guide CB differentiation by encapsulating the CB and the early-cyst stages (Kirilly et al.,  
72 2011; Shi et al., 2021; Upadhyay et al., 2016). Follicle stem cells (FSCs), which are present  
73 towards the posterior of the germarium, divide and differentiate to give rise to follicle cells, (FCs)  
74 which surround the late-stage cysts that give rise to egg chambers (Margolis and Spradling, 1995;  
75 Nystul and Spradling, 2010; Rust et al., 2020). FSCs also give rise to stalk cells and polar cells  
76 which connect the individual egg chambers that comprise the ovariole (Margolis and Spradling,  
77 1995; Nystul and Spradling, 2010; Rust et al., 2020; Sahai-Hernandez et al., 2012).

78

79 While there is a wealth of bulk RNA-seq, single-cell mRNA-seq (scRNA-seq), and translational  
80 efficiency data from polysome-seq experiments for the cells in the germarium, there are several  
81 hurdles for easy utilization of this data:

82

- 83 1. scRNA-seq has exquisite temporal resolution but it can miss some lowly expressed  
84 transcripts which are better captured by bulk RNA-seq (Lähnemann et al., 2020).  
85 However, there is no easy way to compare these two data sets.
- 86 2. While scRNA-seq provides mRNA levels, it does not indicate if these mRNAs are  
87 translated, especially in the germline where translation control plays an important role  
88 (Blatt et al., 2020; Slaidina and Lehmann, 2014).
- 89 3. Lastly, there is a barrier to the visualization of the data for those who are not experienced  
90 in bioinformatics.

91

92 Here, we have developed a tool that we call Oo-site which integrates bulk RNA-seq, scRNA-seq,  
93 and polysome-seq data to spatially visualize gene expression and translational efficiency in the  
94 germarium.

95

## 96 **Results**

97 To make bulk RNA-, scRNA-, and polysome-, seq data accessible to the community, we have  
98 collated and reprocessed previously published sequencing datasets of ovaries enriched for  
99 GSCs, CBs, cysts, and egg chambers (**Figure 1B**). Notably, each genetically enriched sample

100 had matched bulk RNA-seq and polysome-seq libraries prepared, allowing for simultaneous read-  
101 out of mRNA level and translation status (**Supplemental Figure 1A**). One limitation is that the  
102 enriched cyst stages do not resolve each distinct stage of cyst development, instead, these  
103 samples represent a mixture of cyst stages. Therefore to supplement the enrichment data, we  
104 have integrated scRNA-seq data from Slaidina *et al.* which provides a more discrete temporal  
105 resolution of the cyst stages (Slaidina *et al.*, 2021). We present these data as a tool called Oo-  
106 site (<https://www.ranganlab.com/Oo-site>), a collection of interactive visualizations that allows  
107 researchers to easily input a gene or collection of genes of interest to determine their expression  
108 pattern(s).

109  
110 Oo-site consists of three modules: ovary-map, ovary-heatmap, and ovary-violin (**Figure 1C**). Each  
111 module allows users to visualize expression from matched mRNA-seq and polysome-seq data of  
112 genetically enriched stages of early GSC differentiation as well as previously published scRNA-  
113 seq data (Slaidina *et al.*, 2021). Additionally, we have integrated scRNA-seq expression data for  
114 genes that cluster in somatic cell populations that reside in the germarium (Slaidina *et al.*, 2021),  
115 however, here we focus on the germline (Slaidina *et al.*, 2021). Ovary-map allows users to  
116 visualize the expression of a single gene over the course of differentiation in the framework of a  
117 germarium schematic, which contextualizes staging for those less familiar with *Drosophila*  
118 oogenesis. Ovary-heatmap consists of a clustered, interactive heatmap of genes determined to  
119 be differentially expressed that allows users to explore expression trends over-development  
120 (**Figure 1B, Supplemental Figure 1B-C'**). Finally, ovary-violin allows users to visualize the  
121 expression of multiple genes over the course of differentiation (**Figure 1C**). These groups of  
122 genes can be selected either by a GO-term of interest or a custom list of genes supplied by the  
123 user. The user can download a spreadsheet of gene expressions corresponding to the subset of  
124 selected or input genes. Finally, Oo-site incorporates a reporting tool that generates a  
125 downloadable report of the visualization(s) in a standardized format to facilitate their use for  
126 publication (**Figure 1C**). Researchers can use these datasets to enhance hypothesis generation  
127 or to confirm expression patterns observed from other methods.

128  
129 Using Oo-site, we first determined if the bulk RNA-seq data that was acquired by enriching for  
130 specific stages of germline development is representative of the gene expression patterns from  
131 purified cell types. We compared bulk RNA-seq data obtained by enriching for GSC and CB cell  
132 types without purification from somatic cells (**Figure 1C**) to the GSC and CB data from Wilcockson  
133 *et al.* where they included a fluorescent-assisted cell sorting (FACS) step to eliminate somatic

134 cells so that a pure population of these germline cells was sequenced (Wilcockson and Ashe,  
135 2019). We analyzed the expression of genes that Wilcockson *et al.* identified as 2-fold or more  
136 down- or upregulated with a p-value < 0.01. We found that in the enriched bulk RNA-seq data  
137 these genes followed similar trends as identified by Wilcockson *et al.*, indicating that despite the  
138 lack of FACS purification, enrichment of cell types reproduces meaningful mRNA expression  
139 changes over these stages (**Supplemental Figure 2A-A'**).

140  
141 To determine if the bulk RNA-seq data recapitulates genuine changes in gene expression, we  
142 compared the expression of *ribosomal small subunit protein 19b* (*RpS19b*) in bulk RNA-seq to  
143 scRNA-seq data. Our bulk RNA-seq data, as well as the available scRNA-seq data indicated that  
144 *RpS19b* was highly expressed in GSCs, decreased during differentiation in the cyst stages and  
145 was greatly decreased in expression in early egg chambers, consistent with previous reports (**Fig**  
146 **2A-B**) (McCarthy et al., 2021; Sarkar et al., 2021). To further validate this expression pattern, we  
147 probed the expression of *RpS19b* *in vivo* using *in situ* hybridization as well as an *RpS19b::GFP*  
148 line that is under endogenous control elements (McCarthy et al., 2021). We found that *RpS19b*  
149 was present in the GSCs and diminishes in the cyst stages both at the mRNA and protein level  
150 (**Figure 2C-E'**). Additionally, *RpS19b::GFP* expression resembled its mRNA expression  
151 indicating that its dynamic expression is achieved primarily through modulating the mRNA level  
152 of *RpS19b*, consistent with its moderate to high translational efficiency in early stages (**Figure**  
153 **2C-D, Supplemental Figure 2B**). Thus, enriching for specific germline stages captures changes  
154 to gene expression in the germline. However, we note that care should be taken in interpreting  
155 bulk RNA-seq results as the data may be influenced by the somatic cells present in the samples.  
156 However, simultaneous comparison with scRNA-seq can alleviate this problem.

157  
158 To determine the groups of genes that change as the GSCs differentiate into an egg, we used  
159 gene ontology (GO)-term analysis to probe for pathways that change at the level of RNA using  
160 bulk RNA-seq data. We did not identify any significant GO-terms in genes that are differentially  
161 expressed between GSCs and CBs. We found that genes with lower expression in GSCs  
162 compared to differentiating cysts are enriched in the GO-term polytene chromosome puffing which  
163 is consistent with GO-terms identified in Wilcockson *et al.* for genes that are expressed at lower  
164 levels in GSCs than in differentiating cysts than GSCs (**Figure 3A**). We also identified the polytene  
165 chromosome puffing GO-term in genes downregulated in CBs compared to cysts. Additionally,  
166 we observed that several GO-terms involving peptidase activity were enriched in genes  
167 upregulated in GSCs and CBs compared to cysts (**Figure 3B**). This is consistent with findings

168 suggesting that peptidases can be actively regulated during differentiation and can influence stem  
169 cell fate (Han et al., 2015; Perišić Nanut et al., 2021; Tiaden et al., 2012). We found that two GO-  
170 terms related to glutathione transferase activity were enriched in genes downregulated in GSCs  
171 and CBs compared to ovaries from young-wildtype (young-WT) flies and in CBs compared to  
172 differentiating cysts, suggesting that metabolic processes may be altered during GSC  
173 differentiation. Additionally, comparison of CBs and differentiating cysts to young-WT, which  
174 contain early egg chambers, indicated that downregulated genes were enriched in GO-terms  
175 involving vitelline and eggshell coat proteins (**Figure 3A**).

176  
177 Next, to determine if our data could resolve large-scale expression changes that occur during  
178 oogenesis we examined the expression of genes in the GO-term meiotic cell cycle. Meiosis is  
179 initiated during the cyst stages of differentiation and therefore we would expect genes in the  
180 category, in general, to increase in expression in the *>bam* RNAi; *hs-bam* samples (Carpenter,  
181 1979; Tanneti et al., 2011). We were surprised to find no significant change in the mean mRNA  
182 expression of genes in this GO-term in any of our enriched stages compared to enriched GSCs,  
183 though this does not preclude gene expression changes for individual genes (**Supplemental**  
184 **Figure 3A**). However, this is consistent with the observation that several factors that promote  
185 meiosis I are transcribed in the GSCs and the cells that follow (McCarthy et al., 2021). This  
186 suggests that, in general, a transition from a mitotic state to a meiotic state is not driven by large  
187 changes in mRNA levels of meiotic genes.

188  
189 As we did not see overall changes to mRNA levels of genes in the GO-term meiotic cell cycle, we  
190 next examined the polysome-seq data of those genes to determine if changes in expression might  
191 occur at the level of translation. Polysome-seq uses polysome profiling to separate mRNAs that  
192 are associated with polysomes which form by mRNAs engagement with multiple ribosomes. To  
193 quantify the degree to which an mRNA is associated with polysome fractions, we compared the  
194 relative abundance of mRNAs from the polysome fractions to their relative expression using  
195 corresponding input lysates to calculate a metric referred to as translational efficiency (TE).  
196 Indeed, genes in the meiotic cell cycle GO-term had a significant increase in translation efficiency  
197 in CBs and a more dramatic increase in cysts despite no significant changes to the overall mRNA  
198 level of these genes (**Supplemental Figure 3A-B**). Based on scRNA-seq data, the expression of  
199 meiotic cell cycle genes increased slightly but significantly in the 4-CC cluster with a median  
200 increase in expression of 1.25 fold (**Supplemental Figure 3C**). This suggests that some genes  
201 in the meiotic cell cycle GO-term may be regulated at the mRNA level, but as a group this

202 regulation is modest. This is likely because genes in this GO-term are robustly expressed even in  
203 GSCs as the median mRNA level of meiotic cell cycle genes in enriched GSCs is 36.1 TPM, which  
204 exceeds the 70<sup>th</sup> expression percentile among all genes in enriched GSCs.

205

206 To validate this finding, we examined *orientation disrupter (ord)* because it is a well-characterized  
207 gene, is required for sister chromatid cohesion, and has previously been reported to peak in  
208 expression as meiosis begins in *Drosophila* (Bickel et al., 1997, 1996; Khetani and Bickel, 2007).  
209 Our Oo-site results suggested that *ord* mRNA was expressed before meiosis, both from bulk  
210 RNA-seq (**Figure 4A**) and scRNA-seq (**Supplemental Figure 3D**) consistent with reports that  
211 chromosome pairing initiates before meiotic entry (Christophorou et al., 2013; Joyce et al., 2013).  
212 However, polysome-seq data were consistent with the observation that Ord protein expression  
213 increases during the cyst stages due to translation (**Figure 4B**). This led us to predict that *ord*  
214 mRNA would be expressed before meiosis, and that Ord protein expression would increase  
215 during the cyst stages as previously observed, implying a change in the translation status of *ord*  
216 mRNA. To test this, we performed fluorescent *in situ* hybridization against GFP in a fly expressing  
217 Ord-GFP under the control of the *ord* promoter and 5'UTR. We visualized both the GFP protein  
218 and the mRNA and observed increased expression of Ord::GFP protein but consistent *ord::GFP*  
219 mRNA expression, indicating that Ord is controlled post-transcriptionally, likely at the level of  
220 translation based on our polysome-seq data (**Figure 4C-D'**). This finding also underscores the  
221 utility of Oo-site in exploring post-transcriptional gene expression changes.

222

223 To further determine if meiosis is regulated post-transcriptionally, we examined the expression of  
224 genes in the GO-term “Double-strand break repair”, which is known to occur during meiosis 1  
225 (Hughes et al., 2018; Page and Hawley, 2003). Double-stranded breaks are resolved before egg  
226 chamber formation (Hughes et al., 2018; Mehrotra and McKim, 2006; Page and Hawley, 2003).  
227 At the level of input mRNA, we found no significant changes in the expression of genes in this  
228 category compared to enriched GSCs (**Figure 5A**). From scRNA-seq data, the median expression  
229 of double-strand break repair genes significantly increases, but the median increase was only  
230 1.05 fold in 4-CCs and 1.06 in 8-CCs compared to the GSC/CB/2CC group (**Figure 5B**). This  
231 suggests that double-strand break repair gene transcription begins in GSC stages and increases  
232 modestly during the cyst stages.

233

234 In contrast, we found a significant increase in the median translational efficiency of double-strand  
235 break repair genes, with a 1.20 fold increase in the median translational efficiency in enriched

236 CBs and a 1.56 fold increase in enriched cysts compared to enriched GSCs (**Figure 5C**). In  
237 young-WT the median fold change in translational efficiency decreased slightly but significantly  
238 compared to enriched GSCs at 0.95 fold. This is consistent with the observed progression of  
239 double-stranded break repair that occurs *in vivo*. This demonstrates that Oo-site can be used to  
240 derive insights into biological processes that may be changing during early oogenesis (Mehrotra  
241 and McKim, 2006; Page and Hawley, 2003). That key processes related to meiosis and  
242 differentiation are controlled post-transcriptionally is consistent with the importance of proteins  
243 that regulate translation such as Bam and Rbfox1 in differentiation and meiotic commitment during  
244 *Drosophila* oogenesis (Blatt et al., 2020; Carreira-Rosario et al., 2016; Flora et al., 2018; Kim-Ha  
245 et al., 1995; Li et al., 2009; Slaidina and Lehmann, 2014; Tastan et al., 2010).

246

## 247 **Discussion**

248 We have developed an application that facilitates analysis of bulk RNA-seq, sc RNA-seq, and  
249 polysome-seq data of early *Drosophila* oogenesis that is accessible to non-bioinformaticians. We  
250 have demonstrated its utility in representing expression at the mRNA and translation level.  
251 Additionally, we have demonstrated that it can be used to visualize the expression of groups of  
252 genes over development to facilitate hypothesis development. As with all sequencing data, care  
253 should be taken to validate findings from Oo-site as sequencing can be influenced by a myriad of  
254 factors.

255

256 We have used Oo-site to discover that key meiosis regulators such as proteins of the  
257 synaptonemal complex and proteins of the double-strand break machinery are regulated at the  
258 level of translation. This adds to our understanding of the mechanisms regulating the mitotic to  
259 meiotic transition. In future work, identifying the factors mediating the widespread post-  
260 transcriptional regulation of crucial meiotic genes and mechanistically how it drives the mitotic to  
261 meiotic transition is of high importance.

262

263 High-throughput sequencing has enabled researchers to generate more data than ever before  
264 However, the development of analysis tools that are usable without bioinformatics training that  
265 enable users to make sense of these data to generate hypotheses and novel discoveries has  
266 lagged (Shachak et al., 2007). Oo-site allows for hypothesis generation and discovery using the  
267 powerful model system of *Drosophila* oogenesis. We believe Oo-site might also have utility as a  
268 teaching and demonstration tool to introduce students to the power of genomics in developmental  
269 biology. The open-source nature of this software facilitates future tool development, which will be



270 crucial as more researchers delve into more data-intensive scRNA-seq, where visualization tools  
271 are limited and produce plots that may be difficult to interpret for those not versed in  
272 bioinformatics. Oo-site can be supplemented in the future to include additional data such as Cut  
273 and Run for various chromatin marks, nascent mRNA transcription using transient transcriptome  
274 sequencing or similar techniques, or protein levels from mass-spectroscopy to further extend its  
275 utility in hypothesis development.

276

## 277 **Acknowledgements**

278 We thank the Drs. Ruth Lehmann and Maija Sladina for sharing scRNA-seq data with us before  
279 publication of the manuscript. We are grateful to all members of the Rangan laboratory for  
280 discussion and comments on the manuscript. We thank Noor Kotb for naming the dashboard Oo-  
281 site. We also thank Dr. Florence L. Marlow for critically reading and editing the manuscript. P.R.  
282 is funded by the National Institutes of Health NIGMS (RO1GM11177 and RO1GM135628).

283

## 284 **Materials and Methods**

285 The following RNAi stocks were used in this study; *ord-GFP* (Bickel Lab), *Rps19b::GFP*  
286 (McCarthy et al., 2021), *UAS-Dcr2;nosGAL4* (Bloomington stock #25751 ), *bam* RNAi  
287 (Bloomington #58178), *hs-bam/TM3* (Bloomington #24637),

288

## 289 **Sequencing data**

290 Polysome-seq data were obtained from previous studies conducted by the Rangan lab. Data are  
291 available via the following GEO accession numbers:

|                                      |                      |
|--------------------------------------|----------------------|
| 292 >UAS- <i>tkv</i>                 | GSE171349            |
| 293 > <i>bam</i> RNAi                | GSE171349, GSE166275 |
| 294 > <i>bam</i> RNAi; <i>hs-bam</i> | GSE143728            |
| 295 Young-WT                         | GSE119458            |

296

297 Single-cell sequencing data were obtained from Sladina et al., GEO accession: GSE162192

298

## 299 **Code Availability**

300 All code used in the preparation of this manuscript is available on GitHub at  
301 <https://github.com/elliottmartin92/Developmental-Landscape/tree/master/Paper>

302

303 The codebase underlying Oo-site is available on GitHub at  
304 <https://github.com/elliottmartin92/Developmental-Landscape/tree/master/ShinyExpresionMap>

305

### 306 **Antibodies**

307 Mouse anti-1B1 1:20 (DSHB 1B1), rabbit anti-GFP 1:2000 (abcam, ab6556), rabbit anti-Vasa  
308 1:4000 (Upadhyay et al., 2016), chicken anti-Vasa 1:4000 (Upadhyay et al., 2016)

309

### 310 **Polysome-seq**

311 Flies ready for heat shock were placed at 37°C for 2 hours, moved to room temperature for 4  
312 hours, and placed back into 37°C for 2 additional hours. Flies were then left overnight at room  
313 temperature and the same heat shocking procedure was repeated for a total of 2 days. Flies were  
314 then dissected in 1x PBS. Polysome-seq was performed as previously described (McCarthy et  
315 al., 2021).

316

### 317 **Polysome-seq data processing**

318 Reads were mapped to the *Drosophila* genome (dm6.01) using STAR version 2.6.1c. Mapped  
319 reads were assigned to features also using STAR. Translation efficiency was calculated as in  
320 (Flora et al., 2018) using an R script which is available in the Oo-site Github repo. Briefly, TPMs  
321 (transcripts per million) values were calculated. The  $\log_2$  ratio of TPMs between the polysome  
322 fraction and total mRNA was calculated as such to prevent zero counts from overly influencing  
323 the data and to prevent divide by zero errors:  $\frac{Polysome_{TPM+1}}{Input_{TPM+1}}$ . This ratio represents TE, TE of each  
324 replicate was averaged and standard error about the calculated average for each gene was  
325 calculated.

326

### 327 **Differential Expression**

328 Differential expression analysis between all bulk RNA-seq samples in a pairwise manner was  
329 performed using DEseq2 (Love et al., 2014). Differential expression was considered as  
330 Foldchange > |4| fold, FDR < 0.05.

331 Differential expression analysis between all polysome-seq samples in a pairwise manner was  
332 performed using DEseq2 (Love et al., 2014) using the model  $\sim$  type + genotype + genotype:type  
333 with LRT (reduced =  $\sim$  type + genotype) to test for changes in polysome counts controlling for  
334 input counts. Differential expression was considered as (Foldchange > |2| fold, pvalue < 0.05)

335 Differentially expressed genes between all germline clusters from scRNA-seq was determined  
336 using the FindAllMarkers function from Seurat (Hao et al., 2021). Cutoff was `logfc.threshold =`  
337 `0.75`.

338 Differentially expressed genes between all germarium soma clusters from scRNA-seq was  
339 determined using the FindAllMarkers function from Seurat (Hao et al., 2021). Cutoff was  
340 `logfc.threshold = 0.75`.

341

### 342 **GO term heatmaps**

343 GO-term enrichment analysis was performed using Panther (release 20210224) using the default  
344 settings for an Overrepresentation Test of genes differentially expressed between Input samples.  
345 Top 5 GO-terms based on fold enrichment of each category were plotted using ggplot2 (Wickham,  
346 2016).

347

### 348 **Fluorescent *in situ* hybridization**

349 A modified *in situ* hybridization procedure for Drosophila ovaries was followed from Sarkar *et al.*  
350 (2021). Probes were designed and generated by LGC Biosearch Technologies using Stellaris®  
351 RNA FISH Probe Designer, with specificity to target base pairs of target mRNAs. Ovaries (3 pairs  
352 per sample) were dissected in RNase free 1X PBS and fixed in 1 mL of 5% formaldehyde for 10  
353 minutes. The samples were then permeabilized in 1mL of Permeabilization Solution (PBST+1%  
354 Triton X-100) rotating in RT for 1 hour. Samples were then washed in wash buffer for 5 minutes  
355 (10% deionized formamide and 10% 20x SSC in RNase-free water). Ovaries were covered and  
356 incubated overnight with 1ul of the probe in hybridization solution (10% dextran sulfate, 1 mg/ml  
357 yeast tRNA, 2 mM RNaseOUT, 0.02 mg/ml BSA, 5x SSC, 10% deionized formamide, and RNase-  
358 free water) and primary antibody at 30°C. Samples were then washed 2 times in 1 mL wash buffer  
359 with 1ul of corresponding secondary antibody for 30 minutes each and mounted in Vectashield  
360 (VectaLabs).

### 361 **Quantification of Stainings**

362 Stainings were quantified using the Fiji Measure tool. Images were aligned and cropped to place  
363 the stem cell niche at  $x=0$ . Individual cells were outlined within the germarium and Measure was

364 used to calculate the Mean intensity of staining within the cell as well as the X coordinate of the  
365 centroid of the cell. Values were normalized to 1 by dividing Mean Intensity values by the  
366 maximum of the Mean Intensity per germarium. Data were plotted using ggplot2 and a fit line was  
367 added using ggplot2 geom\_smooth with a “loess” function with default settings. The shaded area  
368 around the line represents standard error.

369

370 **Figures**

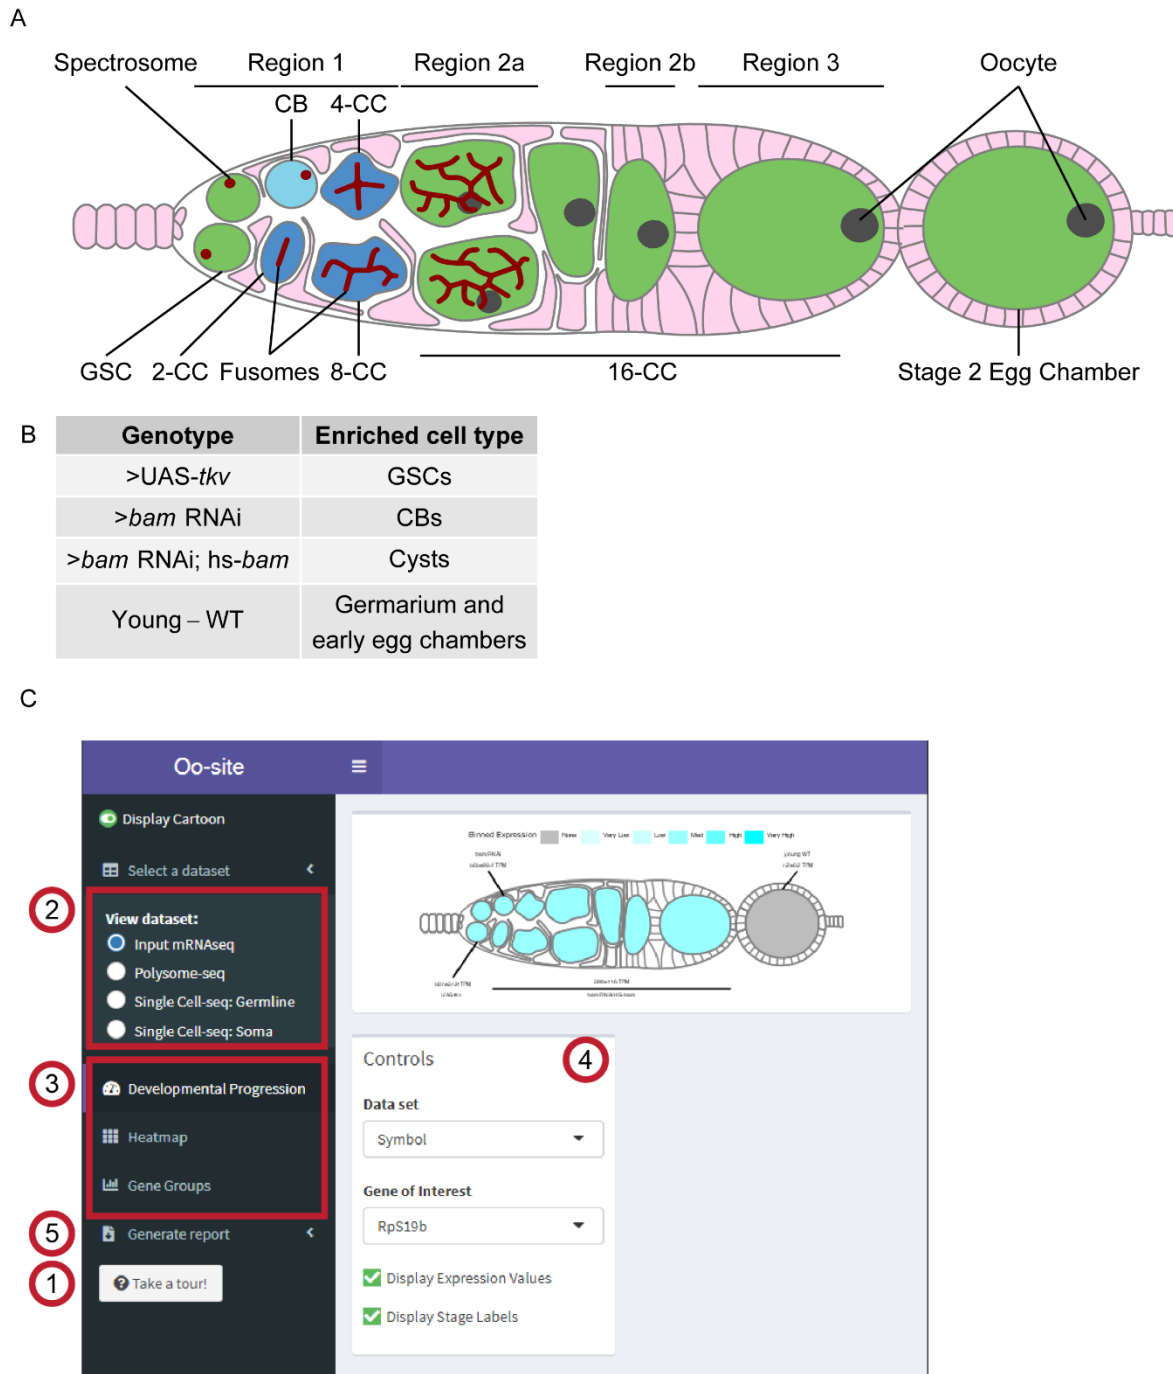

371  
 372 **Figure 1: Oo-site integrates and provides an interface for interacting with multi-omic data**  
 373 **covering major stages of *Drosophila* GSC differentiation.**

374 **(A)** Schematic illustrating developmental stages of germline development. **(B)** Summary of the  
375 samples used for bulk RNA-seq and polysome-seq and the cell types these samples are enriched  
376 for. **(C)** Screenshot of Oo-site dashboard, indicating: (1) “Take a Tour!” function, which guides the  
377 user through the functionality and operation of Oo-site. (2) The available seq datasets which the  
378 user can view, including RNA-seq of ovaries genetically enriched for developmental stages (bulk  
379 RNA-seq), polysome-seq of ovaries genetically enriched for developmental stages (Polysome-  
380 seq), single-cell seq of germline stages (Single-Cell seq: Germline), and single-cell seq of somatic  
381 stages in the germarium (Single-Cell seq: Soma). (3) the available visualizations which the user  
382 can use, including viewing the expression of genes over development at the level of a single gene  
383 (Developmental Progression), viewing all significantly changing genes as heatmaps (Heatmap),  
384 and viewing groups of genes either derived from GO-term categories or supplied by the user  
385 (Gene Groups). (4) The control panel, which the user can use to control the current visualization,  
386 and (5) the Generate Report Function, which can be used to download a PDF report of either the  
387 current visualization or all active visualizations.  
388

A

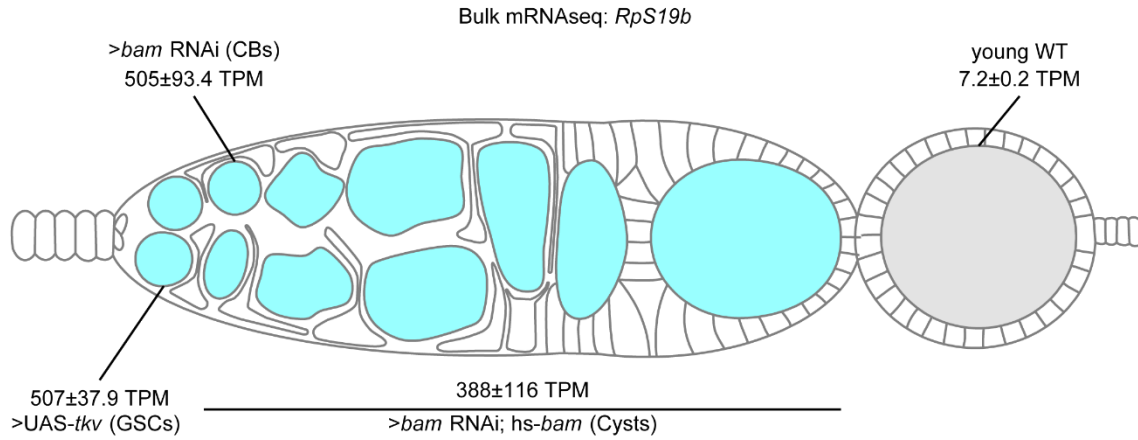

B

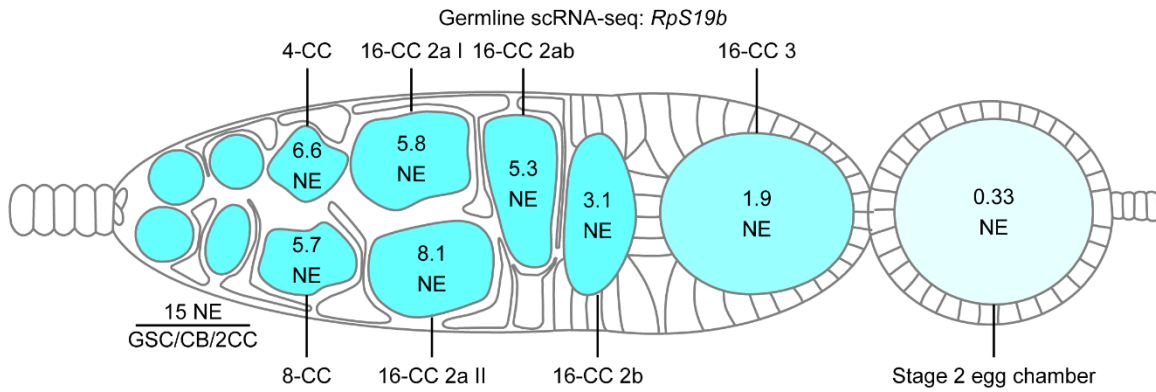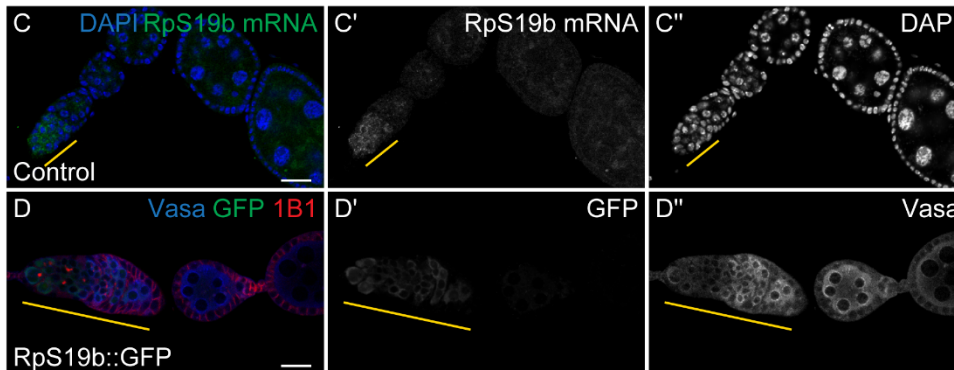

E

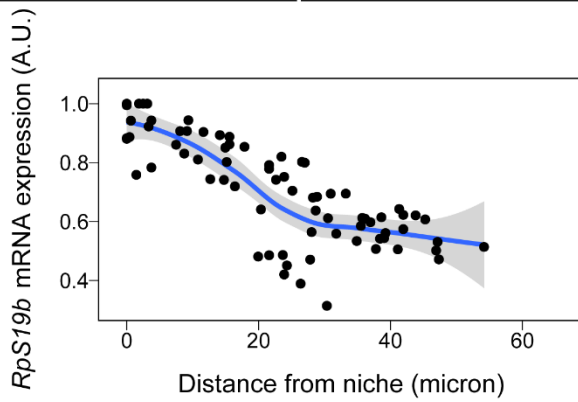

E'

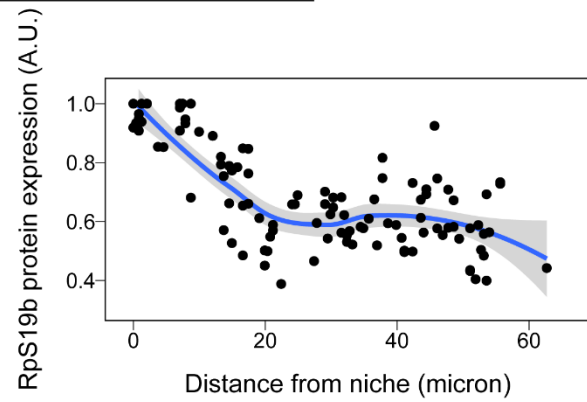

389

390 **Figure 2: Oo-site allows for visualization of dynamically regulated genes**

391 **(A-B)** Visualization of expression of *RpS19b* over germline development from (A) developmentally  
392 enriched stages and (B) single-cell seq data indicate that the mRNA level of *RpS19b* decreases  
393 starting in the cysts and is dramatically decreased in early egg chambers. Color indicates relative  
394 expression and values indicate the (A) mean TPM $\pm$ standard error or (B) the normalized  
395 expression of *RpS19b* in each given stage. **(C-C'')** Confocal images of ovaries with *in situ*  
396 hybridization of *RpS19b* (green, middle greyscale) and stained for DAPI (blue, right greyscale)  
397 demonstrate that the mRNA level of *RpS19b* decreases starting in the cyst stages and are  
398 dramatically lower in early egg chambers consistent with the seq data. **(D-D'')** Confocal images  
399 of ovaries expressing *RpS19b::GFP*, visualizing (D') *GFP* (green, middle greyscale), (D'') *Vasa*  
400 staining (blue, right greyscale), and 1B1 (red) demonstrate that the protein expression of  
401 *RpS19b::GFP* is consistent with its mRNA levels. **(E-E')** Quantifications of normalized mean  
402 intensity of staining, X-axis represents the distance in microns from the niche, Y-axis represents  
403 mean intensity normalized to the maximum mean intensity per germarium of (E) *RpS19b* mRNA  
404 or (E') *RpS19b::GFP*. The line represents fit using a loess regression, shaded area represents  
405 the standard error of the fit. (n=5 germaria).



A

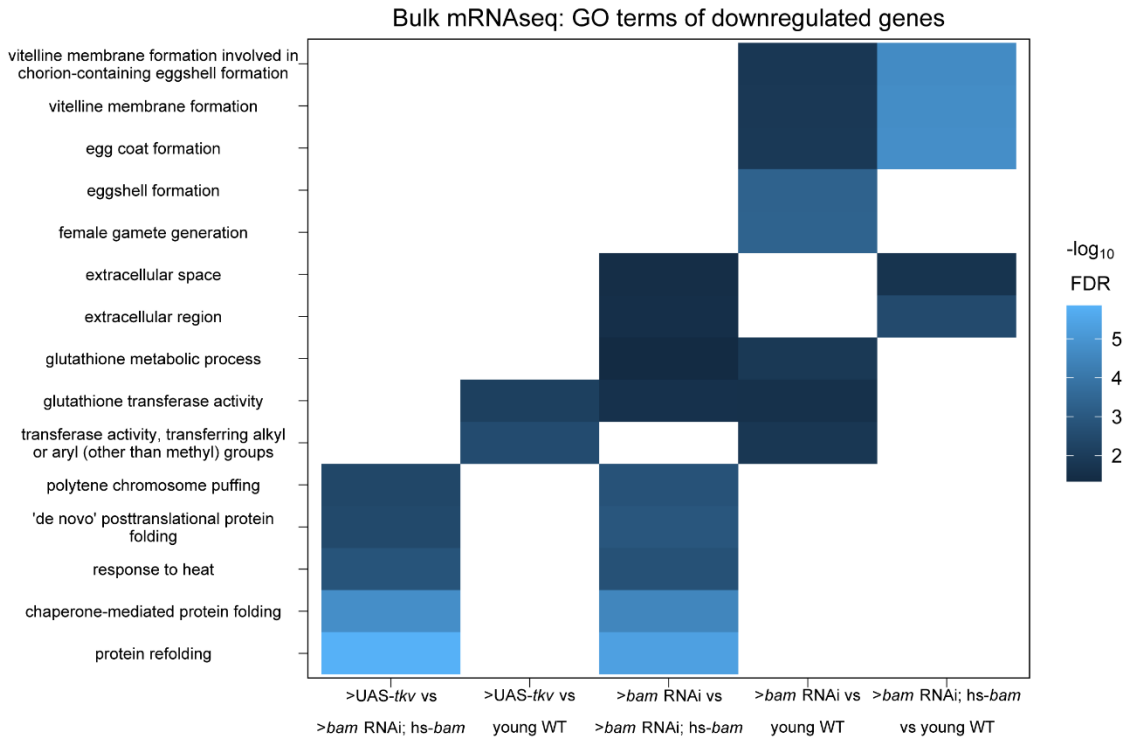

B

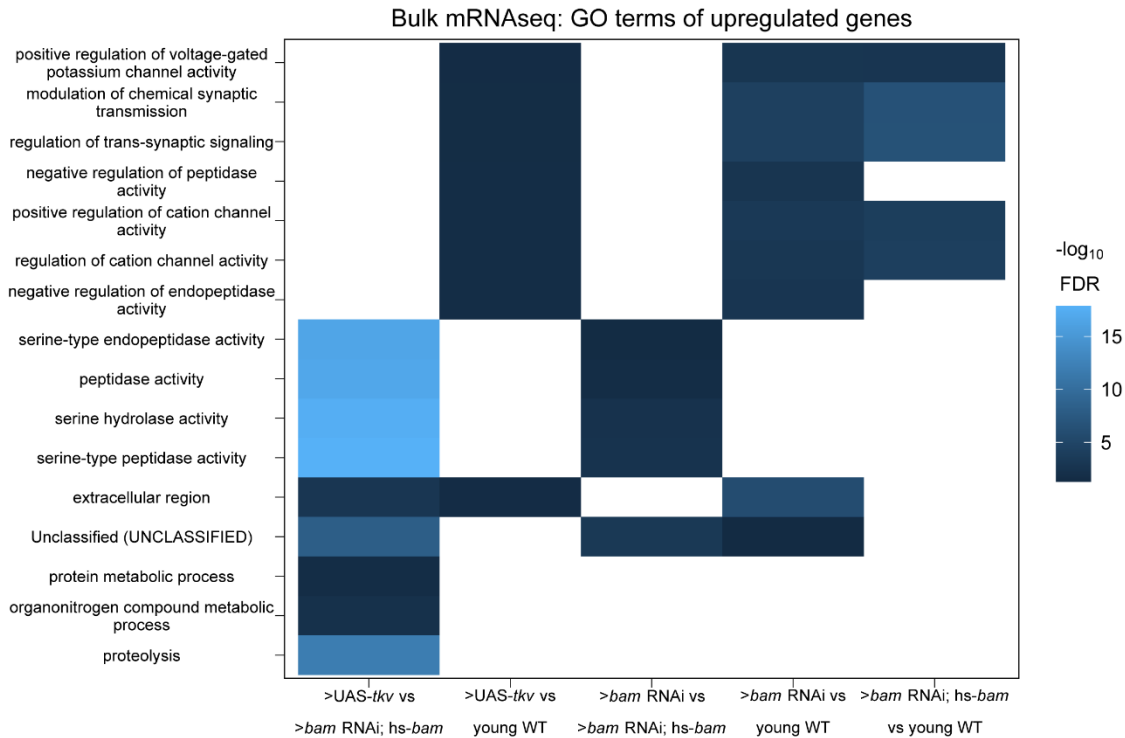

407 **Figure 3: GO-terms enriched from differentially expressed genes between genetically**  
408 **enriched developmental milestones**

409 (A-B) Heatmaps of top five significant GO-terms by fold enrichment resulting from each pairwise  
410 comparison of significantly (A) downregulated or (B) upregulated genes in the first genotype listed  
411 relative to the second genotype listed in the x-axis from bulk RNA-seq of each developmentally  
412 enriched stage. Comparisons that did not generate any significant GO-terms are omitted.  
413

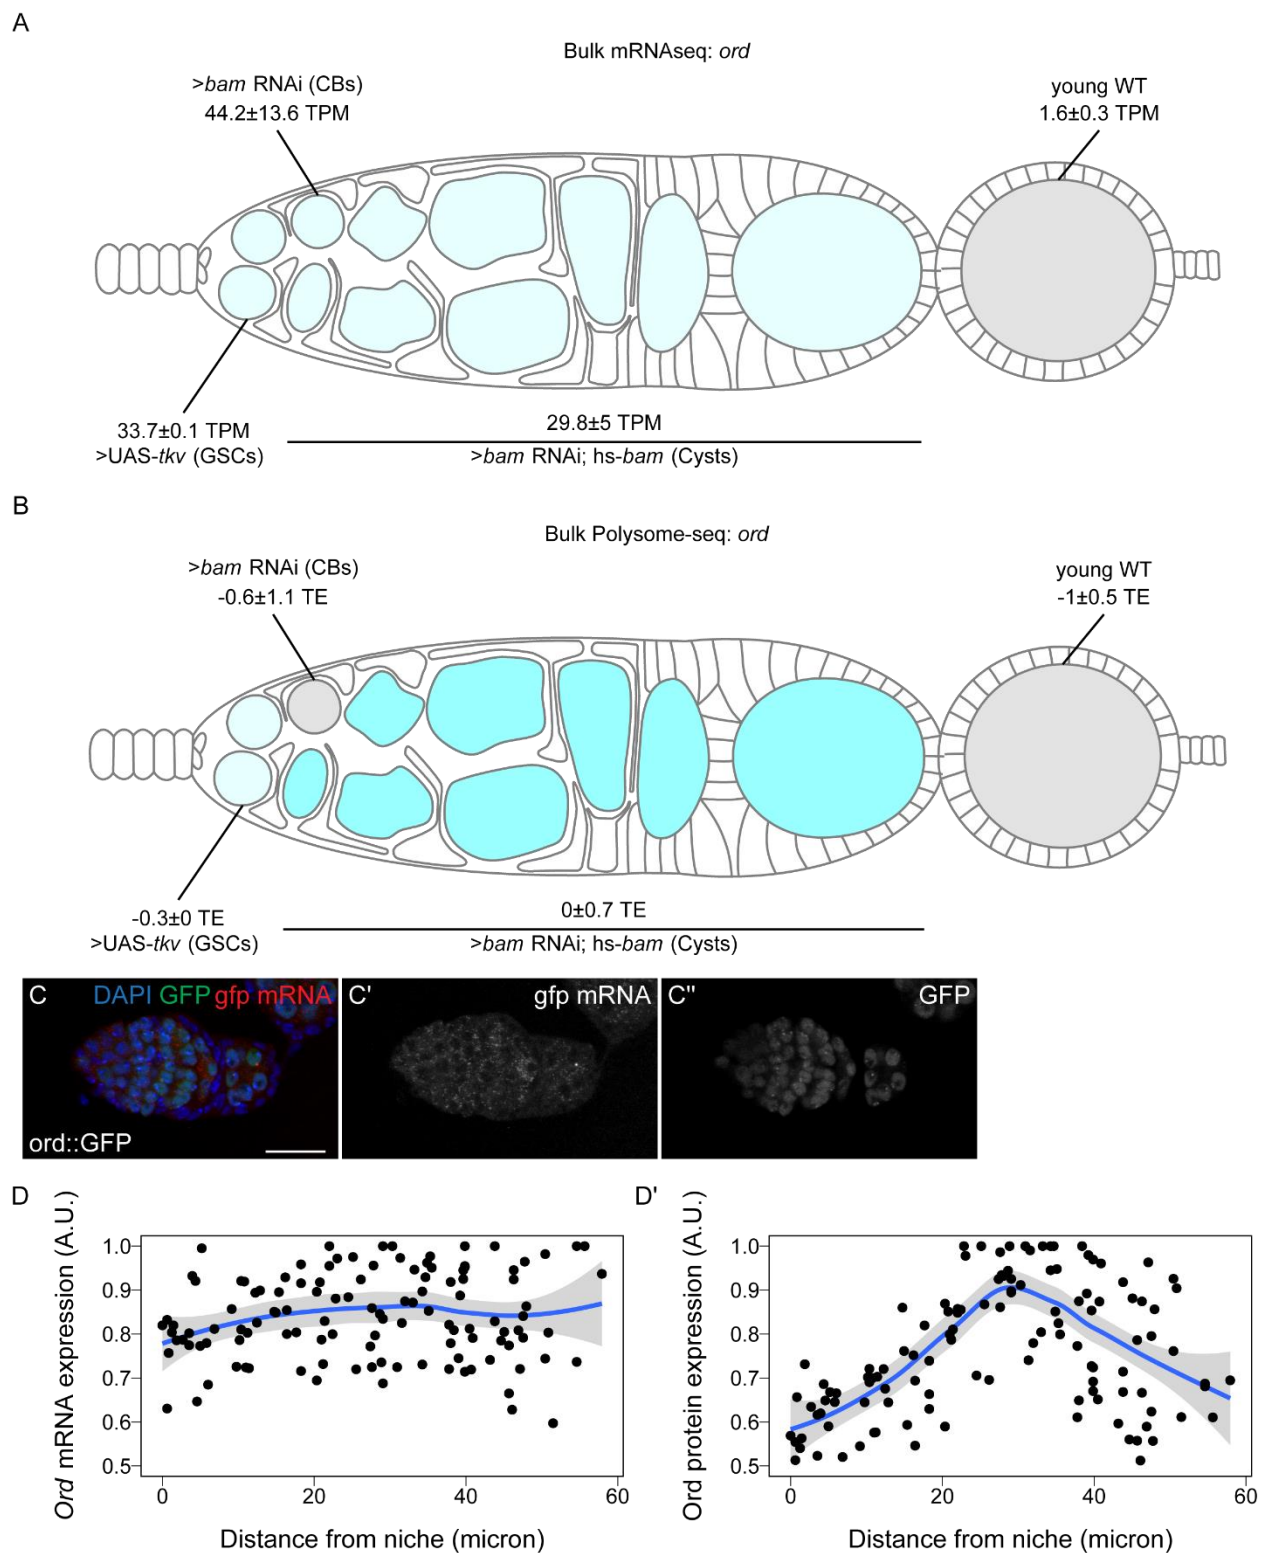

414

415 **Figure 4: Ord expression is controlled post-transcriptionally**

416 (A-B) Visualization of expression of *ord* over germline development from (A) bulk RNA-seq of

417 developmentally enriched stages and (B) polysome-seq of developmentally enriched stages

418 indicates that the mRNA level of *ord* is consistent from GSCs to cysts, until decreasing in early  
419 egg chambers, but the translation efficiency of *ord* increases during the cyst stages compared to  
420 other stages. Color indicates (A) relative expression or (B) TE and values indicate the (A) mean  
421  $TPM \pm$  standard error or (B) the  $\log_2$  mean  $TE \pm$  standard error (**C-C''**) Confocal images of ovaries  
422 expressing Ord::GFP with *in situ* hybridization of *gfp* mRNA (red, middle greyscale) and stained  
423 for GFP protein (green, right greyscale) and DAPI (blue) demonstrate that the mRNA level of  
424 Ord::GFP is consistent throughout the germarium. (**D-D'**) Quantification of normalized mean  
425 intensity of stainings (C-C''). X-axis represents the distance in microns from the niche, Y-axis  
426 represents mean intensity normalized to the maximum mean intensity per germarium of *ord*  
427 mRNA (D) or Ord protein (D). The line represents fit using a loess regression, shaded area  
428 represents the standard error of the fit. (n=8 germaria).

429

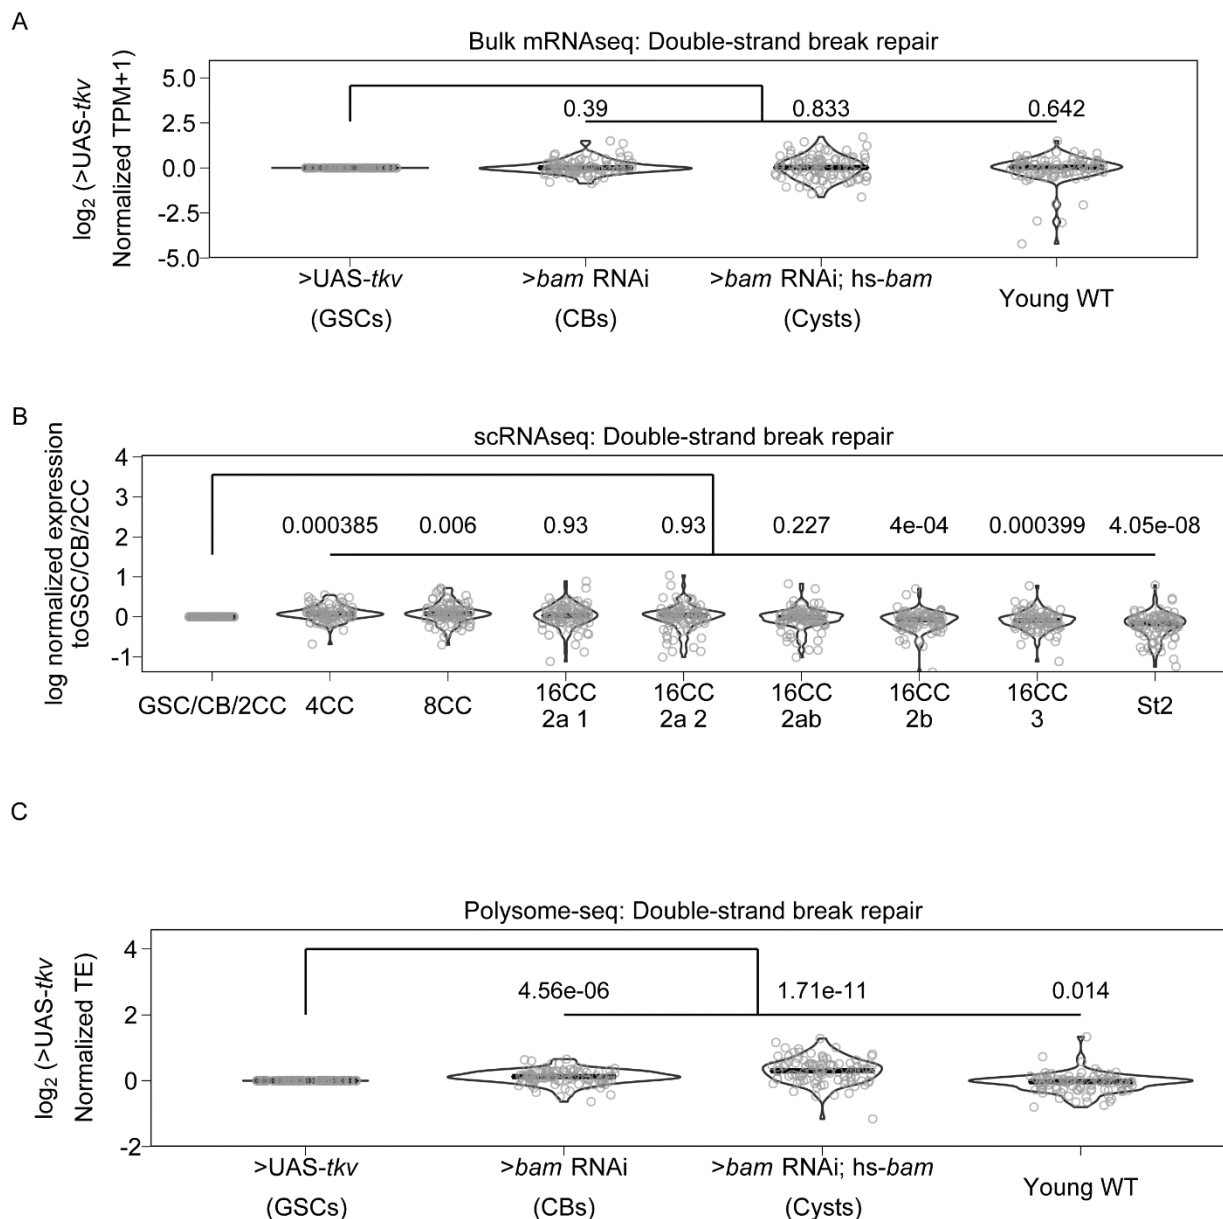

430  
 431 **Figure 5. Genes involved in double-strand break repair may be controlled post-**  
 432 **transcriptionally.**

433 (A) Violin plot of expression of genes in the GO category “Double-strand break repair” from bulk  
 434 RNA-seq. No significant overall change in expression of these genes occurs comparing each  
 435 genetically enriched developmental stage to GSCs. (B) Violin plot of expression of genes in the  
 436 GO category “Double-strand break repair” from scRNA-seq. Overall expression of these genes  
 437 increases in CBs, cysts, and young-WT ovaries compared to the GSC/CB/2CC cluster. Values  
 438 above plots represent Holm-Bonferroni adjusted p-values from a Welch’s t-test between the

439 indicated genotypes (**C**) Violin plot of expression of genes in the GO category “Double-strand  
440 break repair” from polysome-seq. Overall expression of these genes increases in CBs, cysts, and  
441 young-WT ovaries compared to GSCs. Values above plots represent Holm-Bonferroni adjusted  
442 p-values from a Welch’s t-test between the indicated genotypes.

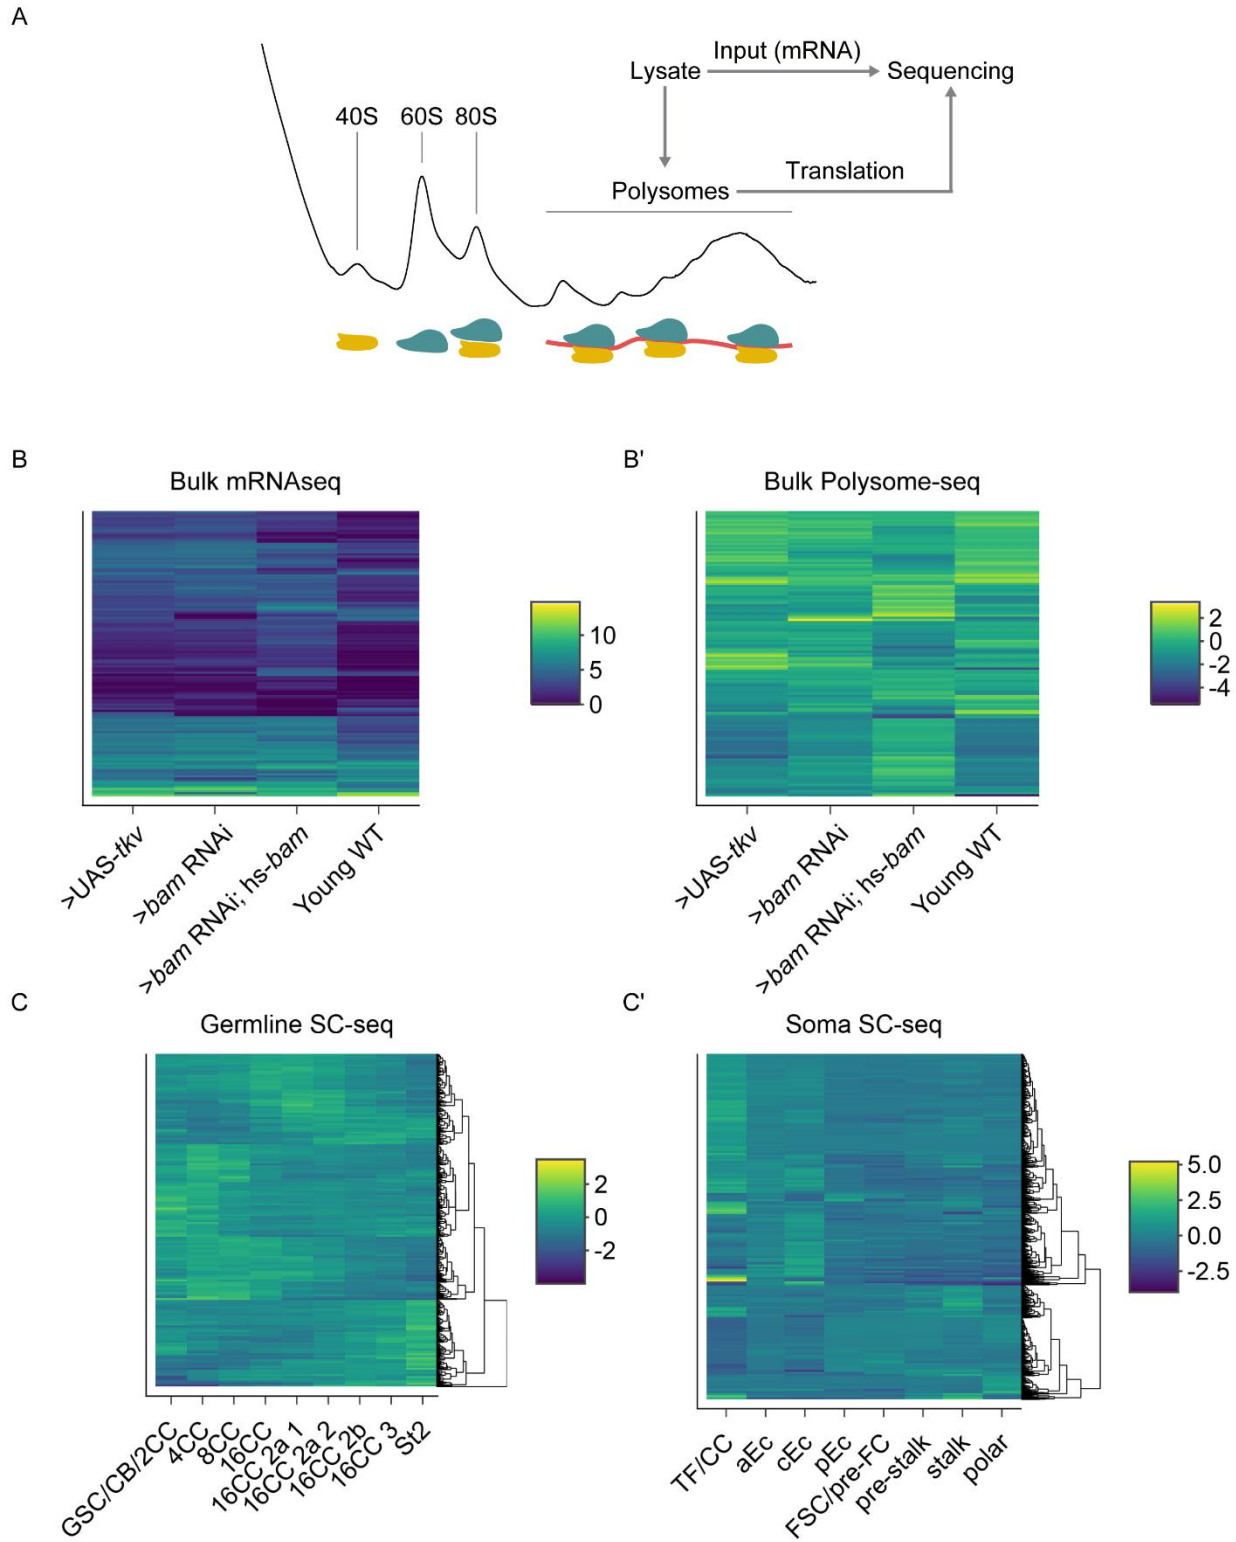

444 **Supplemental Figure 1. Sequencing strategy and clustered heatmaps of differential**  
445 **expression, related to Figure 1**

446 (A) Schematic of strategy used to obtain input mRNA samples and matched polysome-seq  
447 libraries of ovaries genetically enriched for developmental milestones. (B-B') Clustered heatmaps  
448 of (B) bulk RNA-seq and (B')  $\log_2(\text{TE})$  from bulk polysome-seq of the developmental milestones  
449 indicated on the X-axis. Each row in the heatmap indicates a gene that is differentially expressed  
450 in at least one of the milestones compared to all others in a pairwise fashion. Color scale denotes  
451 average relative expression. (C) scRNA-seq of early germline cells and (C') scRNA-seq of  
452 somatic cells in the germarium. X-axis denotes cell-type and each row in the heatmap indicates  
453 a gene that is differentially expressed in at least one of the cell-types compared to all others in a  
454 pairwise fashion.

455



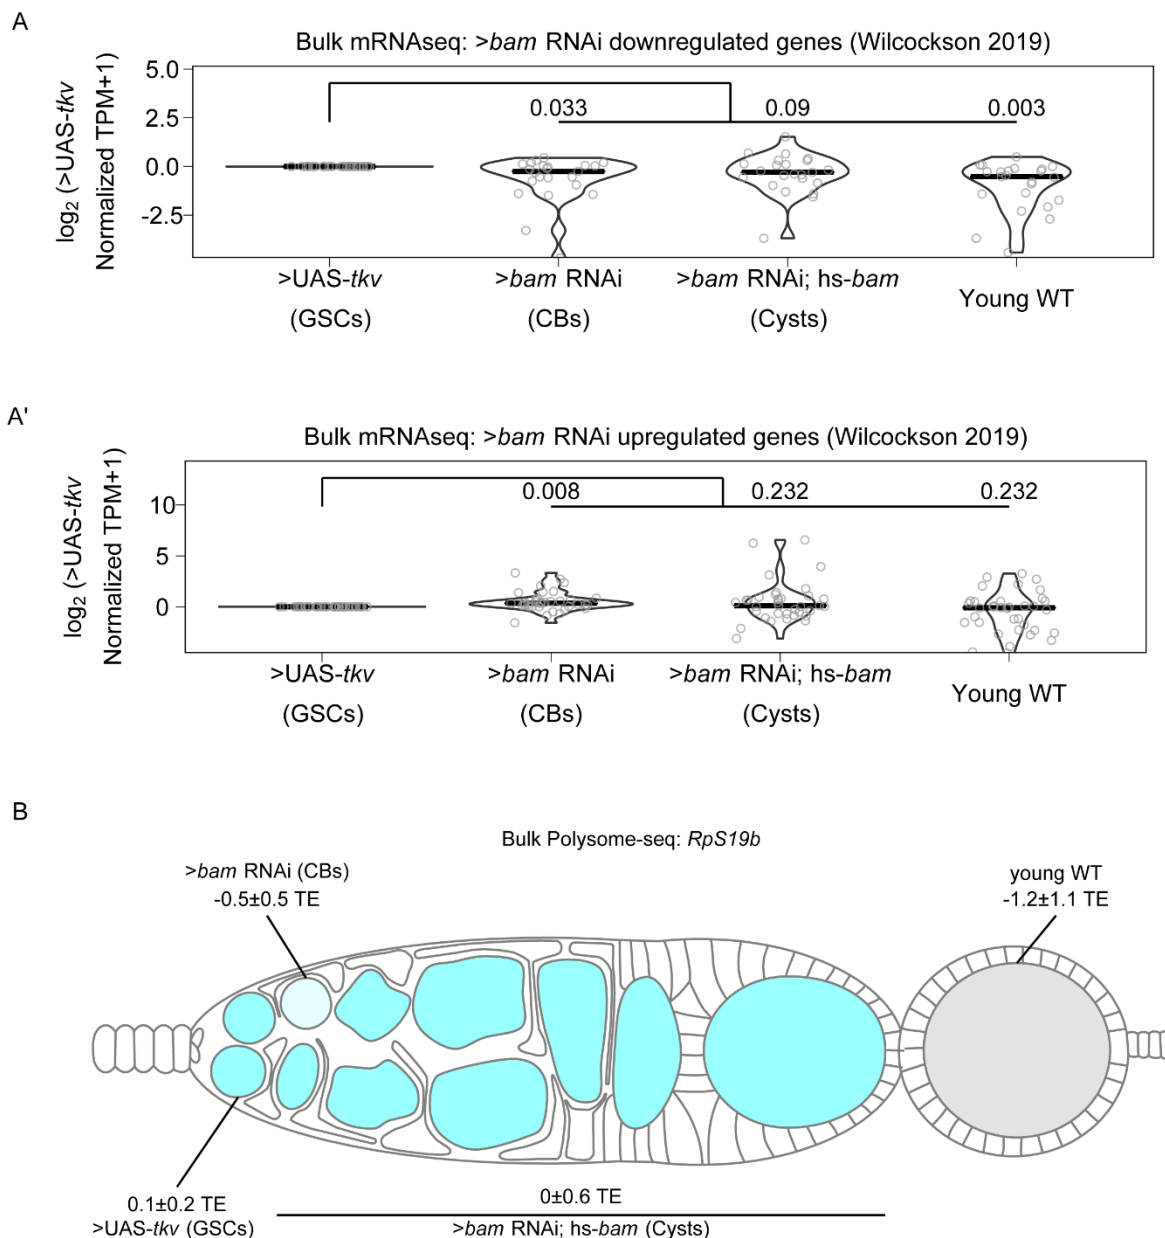

456  
 457 **Supplemental Figure 2. Bulk RNA-seq recapitulates previously observed expression**  
 458 **patterns of gene expression, related to Figure 2**  
 459 (A-A') Violin plots of expression from bulk RNA-seq of genes 2-fold or more (A) down or (A')  
 460 upregulated in *bam* RNAi germline cells compared to UAS-TKV overexpressing germline cell with  
 461 a p-value < 0.01 over germline development from Wilcockson *et al.* demonstrate that bulk RNA-  
 462 seq identifies similar trends in gene expression compared to the FACS based method employed  
 463 by Wilcockson *et al.* Values above plots represent Holm-Bonferroni adjusted p-values from a  
 464 Welch's t-test between the indicated genotypes. (B) Visualization of expression of *RpS19b* over  
 465 germline development from polysome-seq data. Color indicates TE and values indicate the  $\log_2$

466 mean TE±standard error *RpS19b* TE is relatively consistent during early oogenesis and  
467 decreases in the egg chambers.  
468

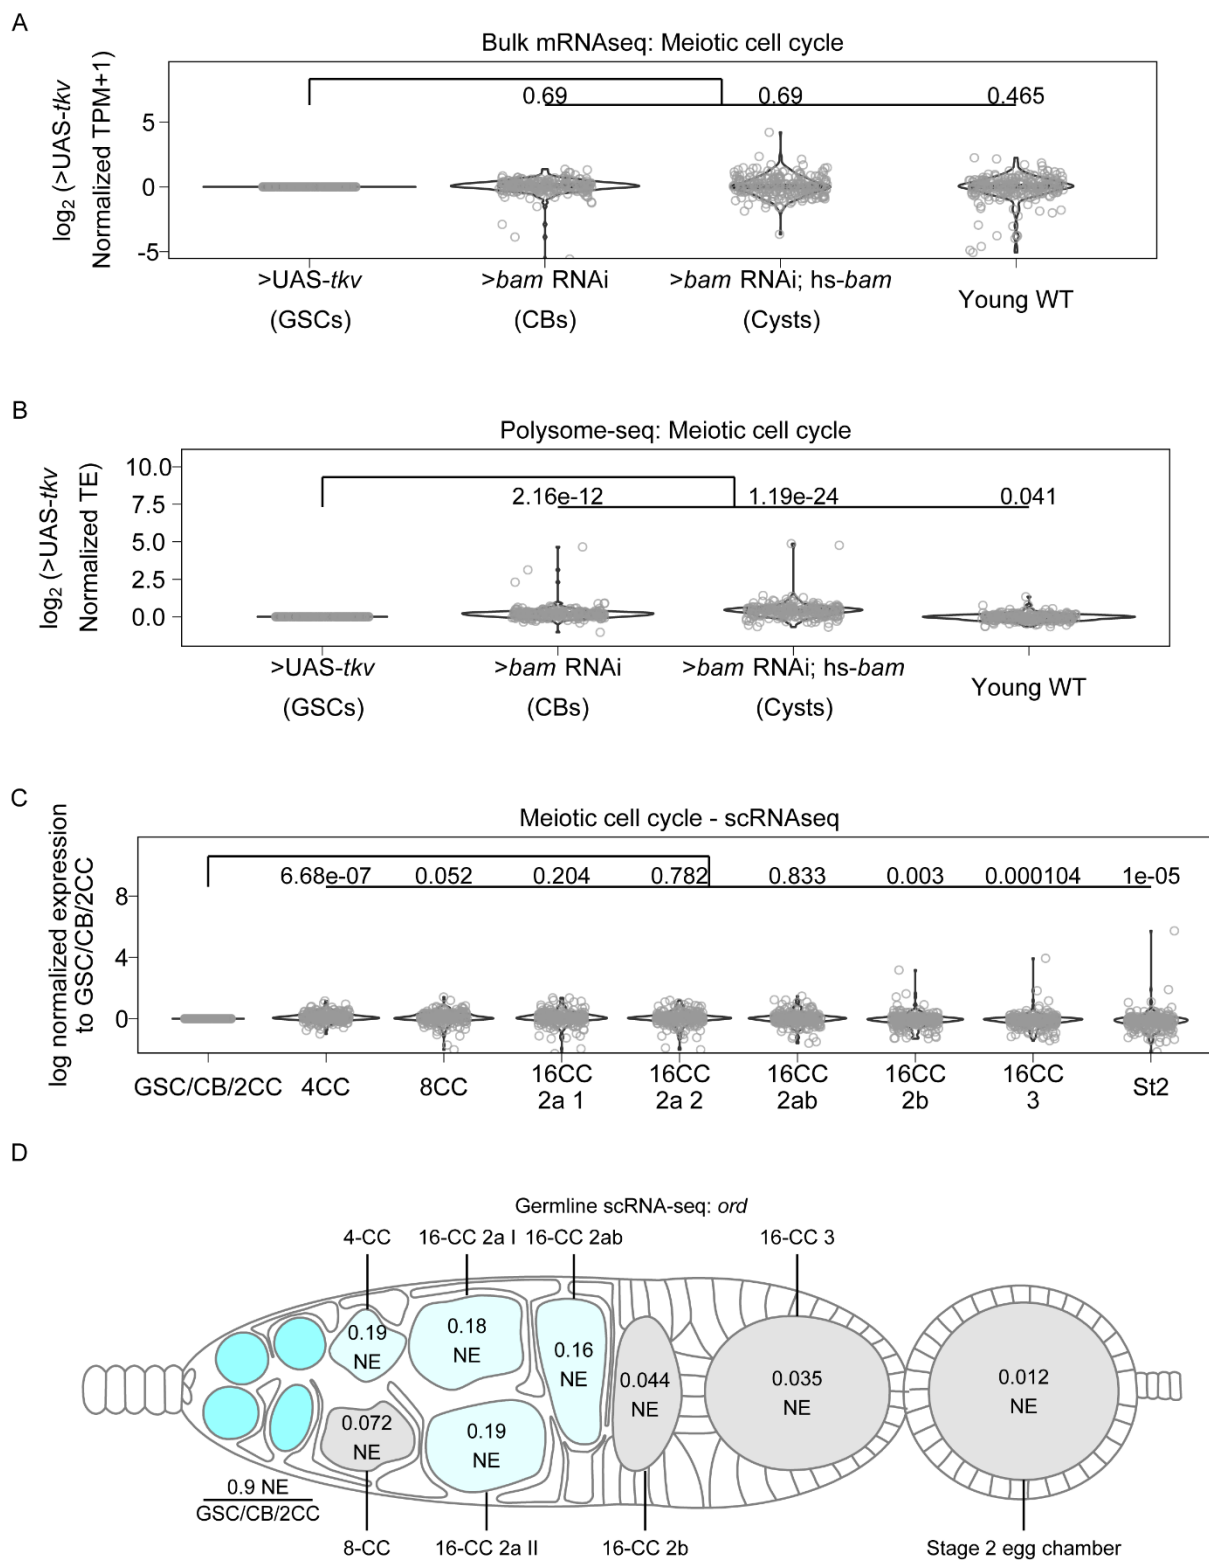

469  
 470 **Supplemental Figure 3. Genes involved in meiotic cell cycle, including *ord*, may be**  
 471 **controlled post-transcriptionally, related to Figure 4.**

472 (A) Violin plots of gene expression from RNA-seq of genes in the GO-term category meiotic cell  
 473 cycle. No significant overall change occurs to expression of these genes at any of the

474 developmental milestones compared to GSCs. Values above plots represent Holm-Bonferroni  
475 adjusted p-values from a Welch's t-test between the indicated genotypes. **(B)** Violin plots of TE  
476 from polysome-seq of genes in the GO-term category meiotic cell cycle. Overall TE increases in  
477 CBs and cysts significantly compared to GSCs indicating that meiotic entry may be partially  
478 controlled post-transcriptionally. Values above plots represent Holm-Bonferroni adjusted p-  
479 values from a Welch's t-test between the indicated genotypes. **(C)** Violin plot of expression of  
480 genes in the GO category "meiotic cell cycle" from scRNA-seq. Overall expression of these genes  
481 increases in CBs, cysts, and young-WT ovaries compared to the GSC/CB/2CC cluster. Values  
482 above plots represent Holm-Bonferroni adjusted p-values from a Welch's t-test between the  
483 indicated genotypes. **(D)** scRNA-seq data indicate that the mRNA level of *ord* is highest in the  
484 GSC/CB/2CC cluster, but remains relatively consistent in its expression starting in the 4-CC  
485 through 16-CC 2ab clusters and is dramatically decreased in early egg chambers. Color and  
486 values indicate the normalized expression of *ord* in each given stage.

487

## 488 **References**

- 489 Bastock, R., St Johnston, D., 2008. *Drosophila* oogenesis. *Curr. Biol.* 18, R1082–R1087.
- 490 Bickel, S.E., Wyman, D.W., Miyazaki, W.Y., Moore, D.P., Orr-Weaver, T.L., 1996. Identification  
491 of ORD, a *Drosophila* protein essential for sister chromatid cohesion. *EMBO J.* 15, 1451.
- 492 Bickel, S.E., Wyman, D.W., Orr-Weaver, T.L., 1997. Mutational Analysis of the *Drosophila*  
493 Sister-Chromatid Cohesion Protein ORD and Its Role in the Maintenance of Centromeric  
494 Cohesion. *Genetics* 146, 1319–1331. <https://doi.org/10.1093/genetics/146.4.1319>
- 495 Blatt, P., Martin, E.T., Breznak, S.M., Rangan, P., 2020. Post-transcriptional gene regulation  
496 regulates germline stem cell to oocyte transition during *Drosophila* oogenesis, in:  
497 *Current Topics in Developmental Biology*. Elsevier, pp. 3–34.
- 498 Cahoon, C.K., Hawley, R.S., 2016. Regulating the construction and demolition of the  
499 synaptonemal complex. *Nat. Struct. Mol. Biol.* 23, 369–377.  
500 <https://doi.org/10.1038/nsmb.3208>
- 501 Carpenter, A.T.C., 1979. Synaptonemal Complex and Recombination Nodules in Wild-Type  
502 *Drosophila melanogaster* Females. *Genetics* 92, 511.
- 503 Carpenter, A.T.C., 1975. Electron microscopy of meiosis in *Drosophila melanogaster* females.  
504 *Chromosoma* 51, 157–182. <https://doi.org/10.1007/BF00319833>
- 505 Carreira-Rosario, A., Bhargava, V., Hillebrand, J., Kollipara, R.K.K., Ramaswami, M., Buszczak,  
506 M., 2016. Repression of Pumilio Protein Expression by Rbfox1 Promotes Germ Cell  
507 Differentiation. *Dev. Cell* 36, 562–571. <https://doi.org/10.1016/j.devcel.2016.02.010>
- 508 Chen, D., McKearin, D., 2003a. Dpp Signaling Silences *bam* Transcription Directly to Establish  
509 Asymmetric Divisions of Germline Stem Cells. *Curr. Biol.* 13, 1786–1791.  
510 <https://doi.org/10.1016/J.CUB.2003.09.033>
- 511 Chen, D., McKearin, D.M., 2003b. A discrete transcriptional silencer in the *bam* gene  
512 determines asymmetric division of the *Drosophila* germline stem cell. *Development* 130,  
513 1159–1170. <https://doi.org/10.1242/dev.00325>
- 514 Christophorou, N., Rubin, T., Huynh, J.-R., 2013. Synaptonemal Complex Components Promote  
515 Centromere Pairing in Pre-meiotic Germ Cells. *PLOS Genet.* 9, e1004012.  
516 <https://doi.org/10.1371/journal.pgen.1004012>

- 517 De Cuevas, M., Spradling, A.C., 1998. Morphogenesis of the *Drosophila* fusome and its  
518 implications for oocyte specification. *Development* 125, 2781 LP – 2789.
- 519 Decotto, E., Spradling, A.C., 2005. The *Drosophila* ovarian and testis stem cell niches: similar  
520 somatic stem cells and signals. *Dev. Cell* 9, 501–510.  
521 <https://doi.org/10.1016/j.devcel.2005.08.012>
- 522 Eliazar, S., Buszczak, M., 2011. Finding a niche: studies from the *Drosophila* ovary. *Stem Cell*  
523 *Res. Ther.* 2, 45. <https://doi.org/10.1186/scri86>
- 524 Flora, P., Wong-Deyrup, S.W., Martin, E.T., Palumbo, R.J., Nasrallah, M., Oligney, A., Blatt, P.,  
525 Patel, D., Fuchs, G., Rangan, P., 2018. Sequential regulation of maternal mRNAs  
526 through a conserved cis-acting element in their 3' UTRs. *Cell Rep.* 25, 3828–3843.
- 527 Forbes, A.J., Lin, H., Ingham, P.W., Spradling, A.C., 1996. hedgehog is required for the  
528 proliferation and specification of ovarian somatic cells prior to egg chamber formation in  
529 *Drosophila*. *Dev. Camb. Engl.* 122, 1125–1135.
- 530 Han, R., Wang, X., Bachovchin, W., Zukowska, Z., Osborn, J.W., 2015. Inhibition of dipeptidyl  
531 peptidase 8/9 impairs preadipocyte differentiation. *Sci. Rep.* 5, 12348.  
532 <https://doi.org/10.1038/srep12348>
- 533 Hao, Y., Hao, S., Andersen-Nissen, E., Mauck, W.M., Zheng, S., Butler, A., Lee, M.J., Wilk,  
534 A.J., Darby, C., Zager, M., Hoffman, P., Stoeckius, M., Papalexi, E., Mimitou, E.P., Jain,  
535 J., Srivastava, A., Stuart, T., Fleming, L.M., Yeung, B., Rogers, A.J., McElrath, J.M.,  
536 Blish, C.A., Gottardo, R., Smibert, P., Satija, R., 2021. Integrated analysis of multimodal  
537 single-cell data. *Cell* 184, 3573-3587.e29. <https://doi.org/10.1016/j.cell.2021.04.048>
- 538 Hinnant, T.D., Merkle, J.A., Ables, E.T., 2020. Coordinating Proliferation, Polarity, and Cell Fate  
539 in the *Drosophila* Female Germline. *Front. Cell Dev. Biol.* 0.  
540 <https://doi.org/10.3389/fcell.2020.00019>
- 541 Hughes, S.E., Miller, D.E., Miller, A.L., Hawley, R.S., 2018. Female Meiosis: Synapsis,  
542 Recombination, and Segregation in *Drosophila melanogaster*. *Genetics* 208, 875–908.  
543 <https://doi.org/10.1534/genetics.117.300081>
- 544 Huynh, J., St Johnston, D., 2000. The role of BicD, egl, orb and the microtubules in the  
545 restriction of meiosis to the *Drosophila* oocyte. *Development* 127, 2785–2794.  
546 <https://doi.org/10.1242/dev.127.13.2785>
- 547 Huynh, J.-R., St Johnston, D., 2004. The Origin of Asymmetry: Early Polarisation of the  
548 *Drosophila* Germline Cyst and Oocyte. *Curr. Biol.* 14, R438–R449.  
549 <https://doi.org/10.1016/j.cub.2004.05.040>
- 550 Joyce, E.F., Apostolopoulos, N., Beliveau, B.J., Wu, C., -ting, 2013. Germline Progenitors  
551 Escape the Widespread Phenomenon of Homolog Pairing during *Drosophila*  
552 Development. *PLOS Genet.* 9, e1004013. <https://doi.org/10.1371/journal.pgen.1004013>
- 553 Khetani, R.S., Bickel, S.E., 2007. Regulation of meiotic cohesion and chromosome core  
554 morphogenesis during pachytene in *Drosophila* oocytes. *J. Cell Sci.* 120, 3123–3137.  
555 <https://doi.org/10.1242/jcs.009977>
- 556 Kim-Ha, J., Kerr, K., Macdonald, P.M., 1995. Translational regulation of oskar mRNA by Bruno,  
557 an ovarian RNA-binding protein, is essential. *Cell* 81, 403–412.  
558 [https://doi.org/10.1016/0092-8674\(95\)90393-3](https://doi.org/10.1016/0092-8674(95)90393-3)
- 559 Kirilly, D., Wang, S., Xie, T., 2011. Self-maintained escort cells form a germline stem cell  
560 differentiation niche. *Development* 138, 5087–5097. <https://doi.org/10.1242/dev.067850>
- 561 Lähnemann, D., Köster, J., Szczurek, E., McCarthy, D.J., Hicks, S.C., Robinson, M.D., Vallejos,  
562 C.A., Campbell, K.R., Beerenwinkel, N., Mahfouz, A., Pinello, L., Skums, P., Stamatakis,  
563 A., Attolini, C.S.-O., Aparicio, S., Baaijens, J., Balvert, M., Barbanson, B. de, Cappuccio,  
564 A., Corleone, G., Dutilh, B.E., Florescu, M., Guryev, V., Holmer, R., Jahn, K., Lobo, T.J.,  
565 Keizer, E.M., Khatri, I., Kielbasa, S.M., Korb, J.O., Kozlov, A.M., Kuo, T.-H., Lelieveldt,  
566 B.P.F., Mandoiu, I.I., Marioni, J.C., Marschall, T., Mölder, F., Niknejad, A., Raczkowski,  
567 L., Reinders, M., Ridder, J. de, Saliba, A.-E., Somarakis, A., Stegle, O., Theis, F.J.,

- 568 Yang, H., Zelikovsky, A., McHardy, A.C., Raphael, B.J., Shah, S.P., Schönhuth, A.,  
569 2020. Eleven grand challenges in single-cell data science. *Genome Biol.* 21, 31.  
570 <https://doi.org/10.1186/s13059-020-1926-6>
- 571 Lehmann, R., 2012. Germline Stem Cells: Origin and Destiny. *Cell Stem Cell* 10, 729–739.  
572 <https://doi.org/10.1016/j.stem.2012.05.016>
- 573 Li, Y., Minor, N.T., Park, J.K., McKearin, D.M., Maines, J.Z., 2009. Bam and Bgcn antagonize  
574 Nanos-dependent germ-line stem cell maintenance. *Proc. Natl. Acad. Sci.* 106, 9304 LP  
575 – 9309. <https://doi.org/10.1073/pnas.0901452106>
- 576 Lin, H., Spradling, A.C., 1993. Germline Stem Cell Division and Egg Chamber Development in  
577 Transplanted *Drosophila* Germaria. *Dev. Biol.* 159, 140–152.  
578 <https://doi.org/10.1006/dbio.1993.1228>
- 579 Love, M.I., Huber, W., Anders, S., 2014. Moderated estimation of fold change and dispersion for  
580 RNA-seq data with DESeq2. *Genome Biol.* 15, 550. [https://doi.org/10.1186/s13059-014-](https://doi.org/10.1186/s13059-014-0550-8)  
581 [0550-8](https://doi.org/10.1186/s13059-014-0550-8)
- 582 Margolis, J., Spradling, A., 1995. Identification and behavior of epithelial stem cells in the  
583 *Drosophila* ovary. *Development* 121, 3797 LP – 3807.
- 584 McCarthy, A., Sarkar, K., Martin, E.T., Upadhyay, M., Jang, S., Williams, N.D., Forni, P.E.,  
585 Buszczak, M., Rangan, P., 2021. MSL3 promotes germline stem cell differentiation in  
586 female *Drosophila*. *Development dev.* 199625. <https://doi.org/10.1242/dev.199625>
- 587 McKearin, D., Ohlstein, B., 1995. A role for the *Drosophila* bag-of-marbles protein in the  
588 differentiation of cystoblasts from germline stem cells. *Development* 121, 2937 LP –  
589 2947.
- 590 Mehrotra, S., McKim, K.S., 2006. Temporal Analysis of Meiotic DNA Double-Strand Break  
591 Formation and Repair in *Drosophila* Females. *PLOS Genet.* 2, e200.  
592 <https://doi.org/10.1371/journal.pgen.0020200>
- 593 Navarro, C., Lehmann, R., Morris, J., 2001. Oogenesis: Setting one sister above the rest. *Curr.*  
594 *Biol.* 11, R162–R165. [https://doi.org/10.1016/S0960-9822\(01\)00083-5](https://doi.org/10.1016/S0960-9822(01)00083-5)
- 595 Nystul, T., Spradling, A., 2010. Regulation of Epithelial Stem Cell Replacement and Follicle  
596 Formation in the *Drosophila* Ovary. *Genetics* 184, 503–515.  
597 <https://doi.org/10.1534/genetics.109.109538>
- 598 Ohlstein, B., McKearin, D., 1997. Ectopic expression of the *Drosophila* Bam protein eliminates  
599 oogenic germline stem cells. *Development* 124, 3651–3662.
- 600 Page, S.L., Hawley, R.S., 2003. Chromosome Choreography: The Meiotic Ballet. *Science.*  
601 <https://doi.org/10.1126/science.1086605>
- 602 Perišić Nanut, M., Pečar Fonović, U., Jakoš, T., Kos, J., 2021. The Role of Cysteine Peptidases  
603 in Hematopoietic Stem Cell Differentiation and Modulation of Immune System Function.  
604 *Front. Immunol.* 12.
- 605 Roth, S., 2001. *Drosophila* oogenesis: Coordinating germ line and soma. *Curr. Biol.* 11, R779–  
606 R781. [https://doi.org/10.1016/S0960-9822\(01\)00469-9](https://doi.org/10.1016/S0960-9822(01)00469-9)
- 607 Rubin, T., Macaisne, N., Huynh, J.-R., 2020. Mixing and Matching Chromosomes during Female  
608 Meiosis. *Cells* 9, 696. <https://doi.org/10.3390/cells9030696>
- 609 Rust, K., Byrnes, L.E., Yu, K.S., Park, J.S., Sneddon, J.B., Tward, A.D., Nystul, T.G., 2020. A  
610 single-cell atlas and lineage analysis of the adult *Drosophila* ovary. *Nat. Commun.* 11,  
611 5628. <https://doi.org/10.1038/s41467-020-19361-0>
- 612 Sahai-Hernandez, P., Castanieta, A., Nystul, T.G., 2012. *Drosophila* models of epithelial stem  
613 cells and their niches. *WIREs Dev. Biol.* 1, 447–457. <https://doi.org/10.1002/wdev.36>
- 614 Sarkar, K., Kotb, N.M., Lemus, A., Martin, E.T., McCarthy, A., Camacho, J., Iqbal, A., Valm,  
615 A.M., Sammons, M.A., Rangan, P., 2021. A feedback loop between heterochromatin  
616 and the nucleopore complex controls germ-cell to oocyte transition during *Drosophila*  
617 oogenesis. <https://doi.org/10.1101/2021.10.31.466575>

- 618 Schüpbach, T., 1987. Germ line and soma cooperate during oogenesis to establish the  
619 dorsoventral pattern of egg shell and embryo in *Drosophila melanogaster*. *Cell* 49, 699–  
620 707. [https://doi.org/10.1016/0092-8674\(87\)90546-0](https://doi.org/10.1016/0092-8674(87)90546-0)
- 621 Shachak, A., Shuval, K., Fine, S., 2007. Barriers and enablers to the acceptance of  
622 bioinformatics tools: a qualitative study. *J. Med. Libr. Assoc. JMLA* 95, 454.  
623 <https://doi.org/10.3163/1536-5050.95.4.454>
- 624 Shi, J., Jin, Z., Yu, Y., Zhang, Y., Yang, F., Huang, H., Cai, T., Xi, R., 2021. A Progressive  
625 Somatic Cell Niche Regulates Germline Cyst Differentiation in the *Drosophila* Ovary.  
626 *Curr. Biol.* 31, 840-852.e5. <https://doi.org/10.1016/j.cub.2020.11.053>
- 627 Slaidina, M., Gupta, S., Banisch, T.U., Lehmann, R., 2021. A single-cell atlas reveals  
628 unanticipated cell type complexity in *Drosophila* ovaries. *Genome Res.* gr.274340.120.  
629 <https://doi.org/10.1101/gr.274340.120>
- 630 Slaidina, M., Lehmann, R., 2014. Translational control in germline stem cell development. *J.*  
631 *Cell Biol.* 207, 13 LP – 21. <https://doi.org/10.1083/jcb.201407102>
- 632 Spradling, A., Fuller, M.T., Braun, R.E., Yoshida, S., 2011. Germline stem cells. *Cold Spring*  
633 *Harb. Perspect. Biol.* 3, a002642. <https://doi.org/10.1101/cshperspect.a002642>
- 634 Tanneti, N.S., Landy, K., Joyce, E.F., McKim, K.S., 2011. A Pathway for Synapsis Initiation  
635 during Zygotene in *Drosophila* Oocytes. *Curr. Biol.* 21, 1852–1857.  
636 <https://doi.org/10.1016/j.cub.2011.10.005>
- 637 Tastan, Ö.Y., Maines, J.Z., Li, Y., Mckearin, D.M., Buszczak, M., 2010. *Drosophila* Ataxin 2-  
638 binding protein 1 marks an intermediate step in the molecular differentiation of female  
639 germline cysts. *Development* 137, 3167–3176. <https://doi.org/10.1242/dev.050575>
- 640 Theurkauf, W.E., Alberts, B.M., Jan, Y.N., Jongens, T.A., 1993. A central role for microtubules  
641 in the differentiation of *Drosophila* oocytes. *Dev. Camb. Engl.* 118, 1169–80.
- 642 Tladen, A.N., Breiden, M., Mirsaidi, A., Weber, F.A., Bahrenberg, G., Glanz, S., Cinelli, P.,  
643 Ehrmann, M., Richards, P.J., 2012. Human serine protease HTRA1 positively regulates  
644 osteogenesis of human bone marrow-derived mesenchymal stem cells and  
645 mineralization of differentiating bone-forming cells through the modulation of  
646 extracellular matrix protein. *Stem Cells Dayt. Ohio* 30, 2271–2282.  
647 <https://doi.org/10.1002/stem.1190>
- 648 Upadhyay, M., Cortez, Y.M., Wong-Deyrup, S., Tavares, L., Schowalter, S., Flora, P., Hill, C.,  
649 Nasrallah, M.A., Chittur, S., Rangan, P., 2016. Transposon Dysregulation Modulates  
650 dWnt4 Signaling to Control Germline Stem Cell Differentiation in *Drosophila*. *PLOS*  
651 *Genet.* 12, e1005918. <https://doi.org/10.1371/journal.pgen.1005918>
- 652 Wang, X., Page-McCaw, A., 2018. Wnt6 maintains anterior escort cells as an integral  
653 component of the germline stem cell niche. *Dev. Camb. Engl.* 145.  
654 <https://doi.org/10.1242/dev.158527>
- 655 Wei, Y., Reveal, B., Reich, J., Laursen, W.J., Senger, S., Akbar, T., Iida-Jones, T., Cai, W.,  
656 Jarnik, M., Lilly, M.A., 2014. TORC1 regulators Iml1/GATOR1 and GATOR2 control  
657 meiotic entry and oocyte development in *Drosophila*. *Proc. Natl. Acad. Sci.* 111, E5670–  
658 E5677.
- 659 Wickham, H., 2016. *ggplot2: Elegant graphics for data analysis*. Springer-Verlag New York.
- 660 Wilcockson, S.G., Ashe, H.L., 2019. *Drosophila* Ovarian Germline Stem Cell Cytocensor  
661 Projections Dynamically Receive and Attenuate BMP Signaling. *Dev. Cell* 50, 296-  
662 312.e5. <https://doi.org/10.1016/j.devcel.2019.05.020>
- 663 Xie, T., Spradling, A.C., 2000. A Niche Maintaining Germ Line Stem Cells in the *Drosophila*  
664 Ovary. *Science* 290, 328–330. <https://doi.org/10.1126/science.290.5490.328>
- 665 Xie, T., Spradling, A.C., 1998. decapentaplegic Is Essential for the Maintenance and Division of  
666 Germline Stem Cells in the *Drosophila* Ovary. *Cell* 94, 251–260.  
667 [https://doi.org/10.1016/S0092-8674\(00\)81424-5](https://doi.org/10.1016/S0092-8674(00)81424-5)

668 Zaccai, M., Lipshitz, H.D., 1996. Differential distributions of two adducin-like protein isoforms in  
669 the *Drosophila* ovary and early embryo. *Zygote* 4, 159–166.  
670
